# 1 Protection of phage applications in crop production: a 2 patent landscape.

3 D. Holtappels<sup>1</sup>, R. Lavigne<sup>1</sup>, I. Huys<sup>2,\*</sup> and J. Wagemans<sup>1,\*</sup>

4 <sup>1</sup>Laboratory of Gene Technology, KU Leuven, Heverlee, Belgium

5 <sup>2</sup>Centre for Intellectual Property Rights, KU Leuven, Leuven, Belgium

6 Joint corresponding authors\*

7 Prof. dr. Isabelle Huys – Isabelle.huys@kuleuven.be

8 dr. Ir. Jeroen Wagemans – Jeroen.wagemans@kuleuven.be

9 Received: date; Accepted: date; Published: date

10 **Abstract:** In agriculture, the prevention and treatment of bacterial infections represents an  
11 increasing challenge. Traditional (chemical) methods have been restricted to ensure public health  
12 and limit the occurrence of resistant strains. Bacteriophages could be a sustainable alternative. A  
13 major hurdle towards the commercial implementation of phage-based biocontrol strategies  
14 concerns aspects of regulation and intellectual property protection. Within this study, two datasets  
15 have been composed to analyze both scientific publications and patent documents and to get an  
16 idea on the focus of R&D by means of an abstract and claim analysis. 137 papers and 49 patent  
17 families were found searching public databases, their numbers increasing over time. Within this  
18 dataset, the majority of the patent documents were filed by non-profit organizations in Asia. There  
19 seems to be a good correlation between the papers and patent documents in terms of targeted  
20 bacterial genera. Furthermore, granted patents seem to claim rather broad and cover methods of  
21 treatment. This review shows that there is indeed a growing publishing and patenting activity  
22 concerning phage biocontrol. Targeted research is needed to further stimulate the exploration of  
23 phages within integrated pest management strategies and to deal with bacterial infections in crop  
24 production.

25 **Keywords:** Phage Biocontrol ; Patent Landscape ; Crop Production

26

---

## 27 1. Introduction

28 Soon after the discovery of bacteriophages by d’Herelle and Twort at the beginning of the 20<sup>th</sup>  
29 century [1,2], the potential to use these bacterial viruses as a therapeutic was recognized. Although  
30 the first applications of phages focused on human medicine [3], other fields including agriculture  
31 soon began to explore the potential of bacteriophages as biocontrol agents [4]. The first isolation of  
32 phages infecting plant pathogenic bacteria (PPB) dates back to 1924, when it was shown that  
33 *Xanthomonas campestris* pv. *campestris*, causing black rot in *Brassicaceae*, could be lysed by the filtrate  
34 of diseased cabbages [4,5]. The following years, interest in phages as biocontrol agents remained  
35 relatively high [4]. However, the discovery of broad-spectrum antibiotics and other bactericidal  
36 chemicals resulted in a dwindling interest in phage therapy research in general [6].

37 Within the agricultural sector, the prevention and treatment of bacterial infections represents an  
38 increasing challenge. For farmers, devastating losses by bacterial pathogens are generally estimated  
39 to reach 10% of the total production [7] and for some bacterial species like *Xanthomonas campestris* pv.  
40 *campestris* crop yield can be reduced by 25% [8]. Other major threats include *Ralstonia solanacearum*,  
41 *Xylella fastidiosa* and *Pseudomonas syringae* pathovars [9]. In recent years, general antibiotics like  
42 streptomycin as well as copper-based chemicals have been restricted in crop production to ensure  
43 public health and limit the occurrence of resistant strains [10–13]. Because of these restrictions, the  
44 search for sustainable, natural biocontrol of PPBs has come to a critical stage, especially considering  
45 the increased food production needs [14]. Governments have decided to implement Integrated Pest  
46 Management strategies (IPMs) as the standard for crop protection (e.g. The European Parliament and  
47 the Council of the European Union (2009) Directive 2009/128/EC of the European Parliament and of

48 the Council of 21 October 2009) [15]. These strategies are based on the implementation of sustainable  
49 pest control strategies with the emphasis on biological control not to eradicate pests, but to maintain  
50 their populations to avoid economical losses [15]. As phages are the natural predators of bacteria,  
51 and thus fit into this framework of IPM, research on phage-based biocontrol is getting back into the  
52 picture. Some critical proofs of concept on the efficacy of phages as biocontrol agents have been  
53 demonstrated in recent years as reviewed elsewhere [4].

54 A major hurdle towards the commercial implementation of these phage-based biocontrol  
55 strategies in crop protection concerns aspects of regulation and intellectual property protection. The  
56 cost to develop new crop protectants can go up to \$286 million and may take eleven years [16,17].  
57 Therefore, patents can act as a tool to stimulate innovations in the field. They provide the applicant(s)  
58 the right to prohibit others to use their invention for a time span of twenty years in a specific  
59 geographical area. This protection could assure a return-on-investment to the patent holder and  
60 hence serve as an incentivizing tool for research and innovation [18,19]. However, patenting  
61 biological substances like bacteriophages, has been shown to be difficult [20,21]. Nevertheless, the  
62 question remains whether phages and phage-containing products are protectable by patents and  
63 what the scope is of these patents. Here, we present a patent landscape on the existing patents within  
64 the field of phage biocontrol using natural phages in agriculture and correlate this with a systematic  
65 survey of the scientific literature. A database containing the relevant patent documents within this  
66 research area has been set up and analyzed. The number, geographical distribution and legal status  
67 were examined and the scope of the patents was investigated by means of a claim analysis. In parallel,  
68 a database of scientific publications within the same research topic was analyzed to enable  
69 comparisons with the patent information. This analysis allows us to draw conclusions on the amount  
70 and scope of protection of phage-based biocontrol applications in crop production.

## 71 2. Methodology

### 72 *Dataset scientific publications*

73 A dataset consisting of scientific publications on the topic of phage biocontrol in crop production  
74 has been created by searching Web of Science and PubMed using Boolean search operators combined  
75 with a set of keywords relevant for this topic (((“phage”[Title/Abstract] OR “phage therapy”  
76 [Title/Abstract] OR “bacteriophage” [Title/Abstract] OR “phage biocontrol” [Title/Abstract] OR  
77 “bacteriophage therapy” [Title/Abstract])) AND ((“plant”[Title/Abstract] OR  
78 “crop”[Title/Abstract])). The database has been manually curated by eliminating non-relevant papers  
79 (papers discussing human phage therapy or phage biocontrol in food). Therefore, all abstracts of the  
80 scientific publications have been manually curated to verify the relevance to the topic. The last update  
81 of the dataset was on the 17th of February 2019 (Supplementary Table S1) and can be considered as  
82 an up-to-date snapshot of the situation.

### 83 *Patent search, legal status and geographical distribution*

84 An algorithm based on Verbeure *et al.* (2006) [22] was used to set up a dataset of relevant patent  
85 applications and granted patents. In short, a classification search was performed using the  
86 International Patent Classification system (IPC) (A01N63 – C12N7) combined with a set of keywords  
87 relevant for phage applications in the agricultural sector (bacteriophage, phage, phage biocontrol,  
88 phage therapy, bacteriophage therapy, plant, crop) in public databases (EspaceNet, Patent Scope,  
89 Google Patents). The dataset was manually evaluated and was last updated the 17th of February 2019  
90 (Supplementary Table S2).

91 The patent landscape was performed according to Huys *et al.* (2009) [23]. Three different  
92 categories of the legal status were used as retrieved from EspaceNet by evaluating the “Global  
93 dossier” in case of non-European patents or the “INPADOC legal status” and “EP register” for  
94 European patents: Pending (patent application in consideration), Granted (patent that is active in a  
95 specific territory) and Dead, meaning that the application or patent is abandoned (e.g.  
96 WO2014177996 (A1)), refused (e.g. JP2005073562 (A)), withdrawn or deemed to be withdrawn (e.g.

97 CN103430973 (A)) or lapsed (e.g. US19840662065). A patent and/or application is considered “active”  
98 when the application is still pending or when the patent is granted. On the contrary, if the patent  
99 and/or application is dead, it is considered “non-active”.

100 The applicants and the geographical span of the patents were evaluated by looking at the patent  
101 document and its attributed number. The documents were categorized according to continent to have  
102 a better overview (Africa (ZA) , Asia (CN, IN, JP, KR), Oceania (AU, NZ), Europe (DE, EA, EP, ES,  
103 GB, HU, IT), North America (CA, US), South America (AR, BR, CL, CR, GT, MX, PE)).

#### 104 *Categorization of patent documents and scientific publications*

105 To have an understanding of the core focus of patent documents and scientific publications in  
106 terms of genera of bacteria being addressed, both have been categorized among the most prominent  
107 bacterial genera causing plant bacterial diseases as determined by Mansfield *et al.* 2012:  
108 *Agrobacterium*, *Dickeya*, *Erwinia*, *Pectobacterium*, *Pseudomonas*, *Ralstonia*, *Xanthomonas*, *Xylella* and  
109 Other [9]. Here, “Other” has been defined as any other bacterial genus or if the document did not  
110 specify the bacterium addressed. The categorization was based on a claim analysis (both dependent  
111 and independent claims) of the patent documents and an abstract analysis of the scientific  
112 publications.

113 A detailed independent claim analysis has been performed for the granted, active patents to  
114 determine the scope of the patent. Independent claims were analyzed as these generally define the  
115 broadest scope. Claims have been categorized into four categories: (i) the phage itself (“phage”), (ii)  
116 the composition of the phage cocktail and the final product (“composition”), (iii) methods for  
117 producing and/or obtaining phages (“production”) and (iv) the use of phages to treat (non-human)  
118 bacterial diseases (“treatment”). One limitation of this research is that the authors had to rely on  
119 automatic translations of the claims in Asian patents in order to understand their scope. The same  
120 categories have been applied on the scientific publications by interpreting the abstracts of the papers,  
121 enabling a comparison between the scope of patents and scientific papers.

122 Moreover, the impact of the independent claims has been evaluated based on Huys *et al.* 2009  
123 [23] according to Art. 69, Art. 83 and the Protocol of the European Patent Convention (EPC) (“fair  
124 protection for the patentee with a reasonable degree of certainty for third parties”). In case of US  
125 patents, the claim interpretation was based on US Utility Patent Act §112, demanding a “clear written  
126 description” and “best mode for carrying out the invention”. Non-European and non-US patents  
127 were interpreted by the authors in a similar way. Using this methodology, three impact levels could  
128 be defined: narrow, intermediate and broadly defined claims. The circumvention of the claims was  
129 estimated according to the author’s appraisal. Narrow defined claims (green) cover specific details of  
130 the invention and can easily be circumvented e.g. changes in the genomic sequence of the phage,  
131 adaptations to the product composition, different protocols and methods of treatment are not covered  
132 by the claims. Intermediate claims (orange) cover the invention as such without describing details  
133 (e.g. a specific phage for a specific bacterium, a composition of a product or production process).  
134 These claims can be circumvented though this would require substantial inventiveness. The authors  
135 have categorized production and treatment claims as intermediate when these claims cover broad  
136 methods of production of treatment but only for a particular phage. On the other hand, broadly  
137 defined claims (red) cover every aspect of the invention, but are vaguely described and hence claim  
138 outside the invention. However, no full freedom-to-operate analysis for each individual invention  
139 has been made as this is beyond the scope of this study.

### 140 **3. Results**

#### 141 *Patent search, scientific papers and legal status*

142 Searching the different databases resulted in the identification of 49 different patent families  
143 within the field of phage biocontrol in crop production. A patent family is defined as a group of  
144 patents and/or patent applications that have been filed in different countries but protect one and the  
145 same invention and have the same inventor(s). To highlight specific patent families, the first

146 attributed application number has been chosen to represent the family. Within the database, the  
147 families comprise in total 97 patents and applications (both active and non-active). Figure 1 shows  
148 the different patent families organized per year (priority year – dark blue area chart). It shows that  
149 the number of patent families slightly increases in time (peak at 2013) and decreases again as less  
150 patents have been filed in 2016. Information on patent applications from 2017, 2018 and 2019 is not  
151 complete as these applications may not have been published yet.

152 In sharp contrast, 137 scientific publications (1984-2019) were found within Web of Science and  
153 PubMed (Figure 1 – light blue area chart). Publications on phage biocontrol were scarce in the eighties  
154 and nineties of the 20<sup>th</sup> century. However, from the year 2000 onwards, this number has increased  
155 steadily (25 peer reviewed publications in 2018). In other words, there is an increasing trend in the  
156 number of publications over the past decade, demonstrating a discrepancy between scientific  
157 publishing and patent filing. However, not all patent applications from 2017, 2018 and 2019 are  
158 publically available as the 18 month period before publishing is not passed yet.

159 When looking at the patent documents in more detail (Figure 1 – bar charts), a distinction should  
160 be made between “Granted”, “Pending” and “Dead”, based on their legal status as derived from  
161 Espacenet. In total, 59 patents and patent applications (61%) are active – 22 patents (23%) have been  
162 granted, 37 applications (38%) are pending – and 38 patent documents (39%) can be considered dead.  
163 From the latter 39% are applications that were deemed to be withdrawn, 16% are rejected applications  
164 and 16% are lapsed patents. Figure 1 shows an overview of the percentages granted, pending and  
165 dead documents with the same priority year. The first active patent from the dataset dates from 2004  
166 (JP4532959 (B2)). In 2011 there were two families filed, represented by GB20110010647 and  
167 JP20110102153, containing in total six patents and four applications respectively. All the applications  
168 and patents within the first family remain active – 50% is granted and 50% is pending – whereas two  
169 out of four patent applications from the latter family have been rejected. 2012 has the most patents,  
170 26 in total, divided among four different families represented by GB20120017097, KR101584214,  
171 MX2012011440 and US201261716245. This last family contains four granted patents and sixteen  
172 applications. The family represented by GB20120017097 consists of one pending and two dead  
173 applications and one granted patent (US9278141 (B2)). In 2013, there was a peak in the amount of  
174 patent families filed as the number reached nine families. These families consist in total of ten  
175 applications which are all dead. The majority of these applications were deemed to be withdrawn  
176 (80%), meaning that the designation fee was not paid.

177

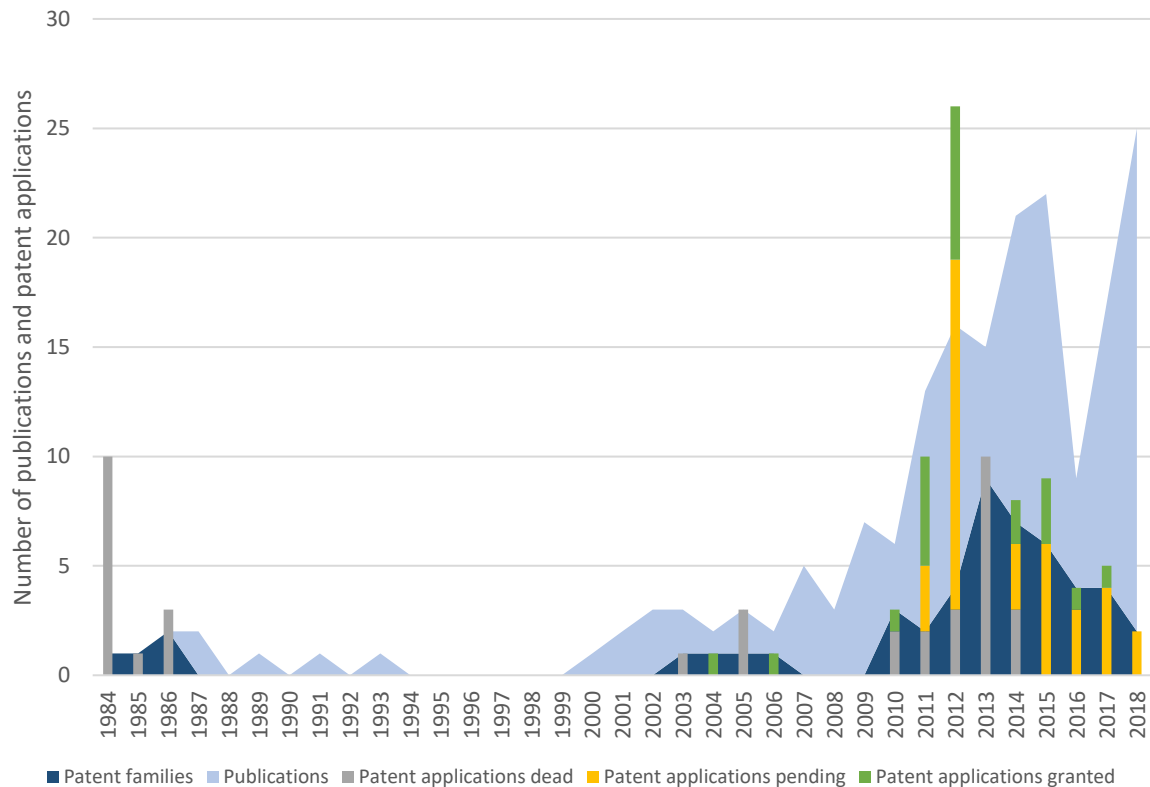

178

179

180

181

182

183

184

185

186

*Figure 1* An overview of the number of scientific publications, patent families, patents and patent applications in the field of phage biocontrol in crop production organized by year. The light blue area chart represents the number of scientific publications and the dark blue area chart the number of patent families per priority year. The bars represent the number of patent applications per priority year: green (“Granted patents”) corresponds to the number of granted patents, yellow (“Pending applications”) pending applications and grey (“Dead applications and patents”) dead patents and applications. This last group consists of patents and applications that are abandoned, refused, withdrawn, deemed to be withdrawn or patents that are lapsed.

187

#### *Applicants and geographical distribution*

188

189

190

191

192

193

194

195

196

197

198

199

Analyzing the applicants of the different patent documents, it shows that 56% (54) of the 97 patent documents have been filed by academia, whereas 37% (36) are linked to industry (without joint applicants) and 7% (7) are joint applicants. This means that the family, or patent documents belonging to a family, have more than one applicant and thus the rights of the patent are distributed among the different partners. The most prominent academic applicants based on the amount of patent families filed by these applicants are the University of Hiroshima (JP) (21% of patent families - 6/28) and the Rural Development Administration (KR) (14% - 4/28). The most prolific company in terms of patent filing is Qingdao Biological Technology Corporation LTD (CN), accounting for 50% (8/16). However, it is worthwhile to mention that all patents within the database from the Qingdao Biological Technology Corporation LTD have been withdrawn. Remarkably, only 4 out of 21 granted patents are filed by applicants from the private sector and all of these patents belong to the same family (represented by GB20110010647 – Fixed Phage).

200

201

202

203

204

205

206

Figure 2 provides an overview of the relative contributions by countries in terms of filed and granted patent applications. 1% of all patent documents were filed in Africa (ZA), 3% in Oceania (AU – NZ), 13% in Europe (DE – EA – EP – ES – GB – HU – IT) and 13% worldwide. The majority of the patent documents have been filed in North America and Asia: 16% in the USA and Canada and 43% in Asia. These Asian documents consist of 45% (19/42) Chinese, 31% (13/42) Japanese, 21% (9/42) Korean and 2% (1/42) Indian applications and patents. When analyzing the legal status of the different patents organized per continent, 33% (14/42) of the Asian patents have been granted, 26%

207 (11/42) of the applications are pending and 40% (17/42) is dead. The large portion of dead patents and  
208 applications is also visible among the European – 54% (7/13) – and among the North American  
209 documents – 44% (7/16). Only 8% (1/13) of European patents are granted, while this is 25% (4/16) of  
210 the North American patents. The amount of pending applications is similar as 38% (5/13) and 31%  
211 (5/16) of the European and North American applications are pending, respectively. On the other  
212 hand, in case of the South American patent applications, 89% (8/9) is pending and 11% is dead.  
213 Notably is that 7/9 of these South American patents are part of the same patent family  
214 (US2016309723).

215 Furthermore, China has the highest percentage of dead patents with 63% (12/19). The majority  
216 of these patent were deemed to be withdrawn after the admission fee was not paid (92%). On the  
217 contrary, Japan and Korea have the highest amount of granted patents, 38% (5/13) and 67% (6/9) of  
218 the patents filed are granted and still active respectively.

219

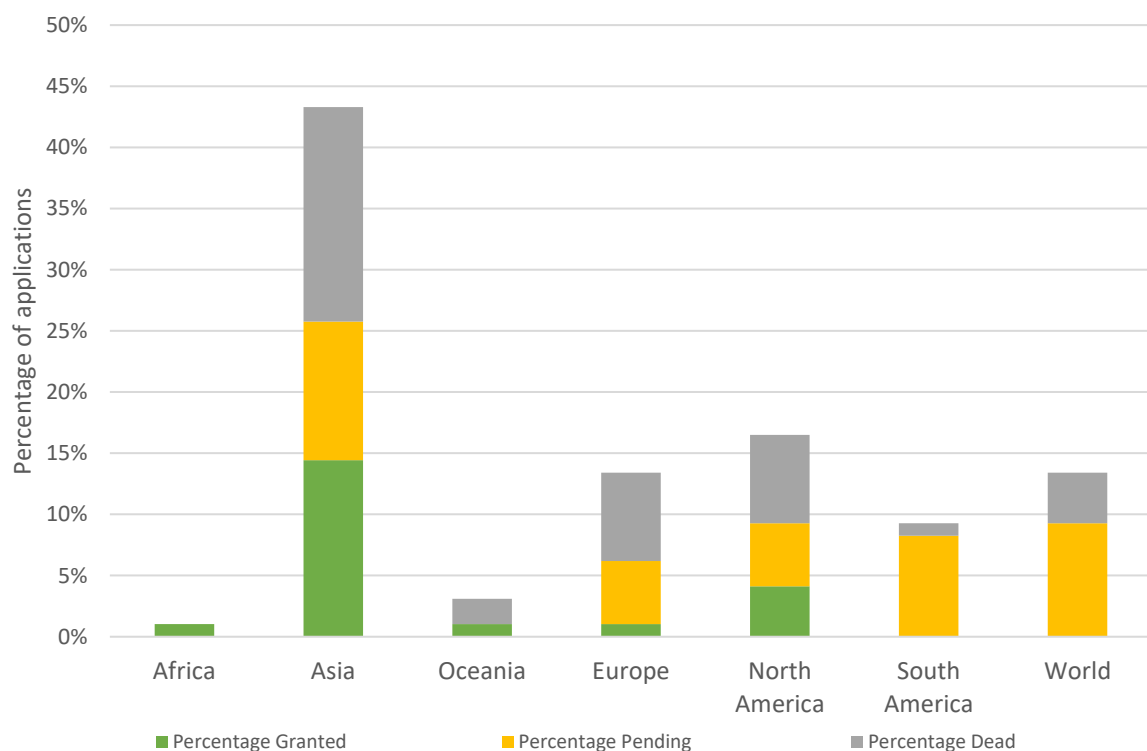

220

221 *Figure 2* Percentage of patents and applications organized per continent. The total height of the bars  
222 indicate the percentage of patents and applications per continent. Africa (ZA), Asia (CN, IN, JP, KR),  
223 Oceania (AU, NZ), Europe (DE, EA, EP, ES, GB, IT), North America (CA, US), South America (AR,  
224 BR, CL, CR, GT, MX, PE) and world applications. In green the percentage of granted patents, in yellow  
225 the percentage of pending applications and in grey the percentage of dead applications and dead  
226 patents.

### 227 *Categorization of patents and scientific publications*

228 As the most prominent bacterial species belong to the genera of *Agrobacterium*, *Dickeya*, *Erwinia*,  
229 *Pectobacterium*, *Pseudomonas*, *Ralstonia*, *Xanthomonas* and *Xylella* [9], patent families and scientific  
230 publications have been categorized and quantified among these groups according to (in)dependent  
231 claims (patent applications) and abstracts (scientific publications) (Figure 3). Combinations of genera  
232 have been created when phages against certain pathogens are combined in a single cocktail (*Dickeya*  
233 / *Pectobacterium* and *Xanthomonas* / *Xylella*). A patent family or publication was classified as “Other”  
234 if it concerns a phage infecting bacteria of other genera (e.g. *Streptomyces* – “McKenna, F., et al. 2001.

235 Novel In vivo use of a polyvalent Streptomyces phage to disinfect Streptomyces scabies-  
236 infected seed potatoes. Plant Pathol. 50:666-675.”) or if the paper/publication has no specification of  
237 the type of phage nor in the independent nor in the dependent claims (e.g. WO2016154602 – “A  
238 method of preparing a phage composition for killing or degrading fitness of a pest”).

239 The least researched bacterial genera within both databases are *Agrobacterium* (0% patent  
240 families, 3% publications), *Pseudomonas* (6% patent families, 5% publications) and *Erwinia* (4% patent  
241 families, 9% publications). The most represented bacterial genera within the datasets as suggested by  
242 Figure 3 are *Ralstonia*, *Xanthomonas - Xylella* and *Dickeya - Pectobacterium*. 16% of the scientific  
243 publications discuss phages infecting *Ralstonia*, 15% *Xanthomonas*, *Xylella* or a combination of  
244 *Xanthomonas* and *Xylella* and 12% *Dickeya*, *Pectobacterium* or a combination of *Dickeya* and  
245 *Pectobacterium*. In case of the patent applications, a similar trend can be observed: 27% *Ralstonia*, 16%  
246 *Xanthomonas / Xylella* and 10% *Dickeya / Pectobacterium*.

247 A closer inspection of the different categories reveals that three patent families within the  
248 category of *Ralstonia* have included a private company as co-applicant (23% - 3/13). On the other  
249 hand, inventions from all patent families filed by public institutes have also been published in  
250 scientific papers (Supplementary Table 3). In case of the category of *Xanthomonas / Xylella*, a similar  
251 trend can be observed, as there are three families filed by industrial applicants represented by  
252 WO2015200519 by Auxergen (US), US2017142976 by Fairhaven Vineyards (US) and HU1700178  
253 Enviroinvest Koernyezetvedelmi es biotechnologiai (HU).

254 The other families are filed by the University of Hiroshima (JP), Texas A&M University (US),  
255 University Huazhong (CN) and the National institute for Agro-Environmental Sciences (JP), all  
256 situated in the public sector. This is also the case for *Dickeya* and *Pectobacterium* as no patents were  
257 filed by private institutes. The applicants here include the Rural Development Administration (KR)  
258 and the national university of Seoul (KR). The majority of the families filed by private institutes are  
259 classified as “Other” (37%), indicating that the patents are not discussing the major genera of bacteria  
260 but rather do not specify the phages nor their host. Hence the claims are defined broadly. Within this  
261 group, the majority of the families are filed by industrial applicants (88%): Fixed phage (GB),  
262 Epibiome (US), Qingdao Biological Technology Corporation LTD (CN) and Internalle (US).

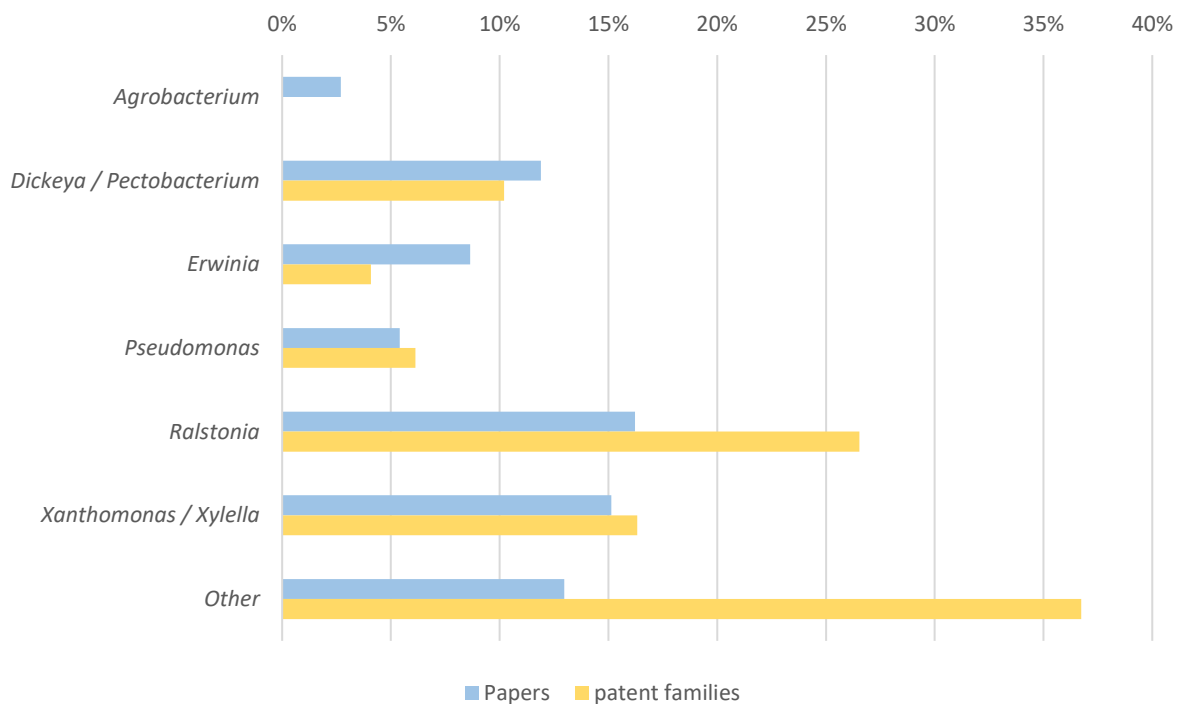

263

264 *Figure 3* Distribution of patent families and scientific publications classified according to the bacterial  
265 genera that is tackled by the phage product. Based on Mansfield *et al.*, 2012 seven categories  
266 (*Agrobacterium*, *Dickeya / Pectobacterium*, *Erwinia*, *Pseudomonas*, *Ralstonia*, *Xanthomonas / Xylella* and  
267 Other) have been made to classify patent families and publications. Groupings of bacterial genera

268 (*Dickeya* – *Pectobacterium* and *Xanthomonas* – *Xylella*) were created as phage cocktails are created to  
269 tackle both bacterial genera. The last category “Other” consists of patent families and publications  
270 that do not specify the bacterial pathogen that is being targeted or that tackle an alternative bacterial  
271 genera.

## 272 *Claim and abstract analysis*

273 A claim analysis has been performed to determine the scope of the individual patents along with  
274 an analysis of the scientific publications. Among the dataset of 91 patent documents analyzed, 21  
275 were active, granted patents. In total, 79 independent claims were systematically analyzed and  
276 classified in five different categories (Figure 4): (1) Phage (e.g. “A bacteriophage able to lyse cells of  
277 *Ralstonia solanacearum* selected from the group of the following: a) *vRsoP-WF2* (DSM 32039), *vRsoP-WM2*  
278 (DSM32040), *vRsoP-WR2* (DSM32041), or b) a podovirus whose genome has the sequence of SEQ ID NO: 1  
279 (corresponding to *vRsoP-WF2*), SEQ ID NO: 2 (corresponding to *vRsoP-WM2*) or SEQ ID NO: 3  
280 (corresponding to *vRsoP-WR2*)” - ES2592352), (2) Composition (e.g. “A composition for inhibiting or  
281 preventing the growth of *Pectobacterium carotovorum*, which comprises as an active ingredient bacteriophage  
282 PM-2 (KACC97022P) having an entire genome sequence consisting of the nucleotide sequence of SEQ ID NO:  
283 1.” – KR101797463), (3) Production (e.g. “A method of propagating a virulent bacteriophage that includes *X*  
284 *fastidiosa* in its host range, comprising the steps of: (a) infecting a culture of *Xanthomonas* bacteria with said  
285 virulent bacteriophage; (b) allowing said bacteriophage to propagate; and (c) isolating virulent bacteriophage  
286 particles from the culture.” – “Production claim” - AU2013331060) and (4) Treatment (e.g. “A method of  
287 preventing or reducing symptoms or disease associated with *Xylella fastidiosa* or *Xanthomonas* in a plant,  
288 comprising contacting said plant with particles of at least one virulent bacteriophage, wherein *Xylella fastidiosa*  
289 and/or *Xanthomonas axonopodis* are hosts of the bacteriophage, wherein the bacteriophage is a *Xfas* 300-type  
290 bacteriophage and displays the following characteristics: (a) the bacteriophage is capable of lysing said *Xylella*  
291 *fastidiosa* and/or *Xanthomonas* bacteria; (b) the bacteriophage infects a cell by binding to a Type IV pilus; (c)  
292 the bacteriophage comprises a non-contractile tail with a capsid size ranging from 58–68 nm in diameter and  
293 belongs to the Podoviridae family; (d) the genomic size of the bacteriophage is about 43300 bp to 44600 bp; and  
294 (e) the bacteriophage prevents or reduces symptoms associated with Pierce’s disease in a plant or plants.” –  
295 US9357785). The same categories were used to classify the scientific publications based on the abstract  
296 of the publication. Both scientific papers and patents can fall in different categories as it may discuss  
297 one of more phages and their basic characterization, the composition of a cocktail and the testing of  
298 this cocktail in bioassays and/or field trials. As Figure 4 shows, there are differences between the  
299 relative contributions of scientific papers and patents that address a specific topic. The majority of  
300 the scientific papers focus on the isolation and basic characterization of one or more phages (84%).  
301 36% of the manuscripts discuss the composition of a phage cocktail and 39% use this cocktail in  
302 bioassays and/or field trials. The least represented topics the production methods of phage (4%). In  
303 contrast, the majority of the patents (90%) protects the use of phages to treat a plant in one way or  
304 another. 76% of the patents claim the composition of a product containing phage, 62% protect the  
305 phage itself and 24% contains claims protecting the production of the phage product. On the other  
306 hand, no patents within the database contain claims to protect methods of detection nor of the phage  
307 nor of the host.

308



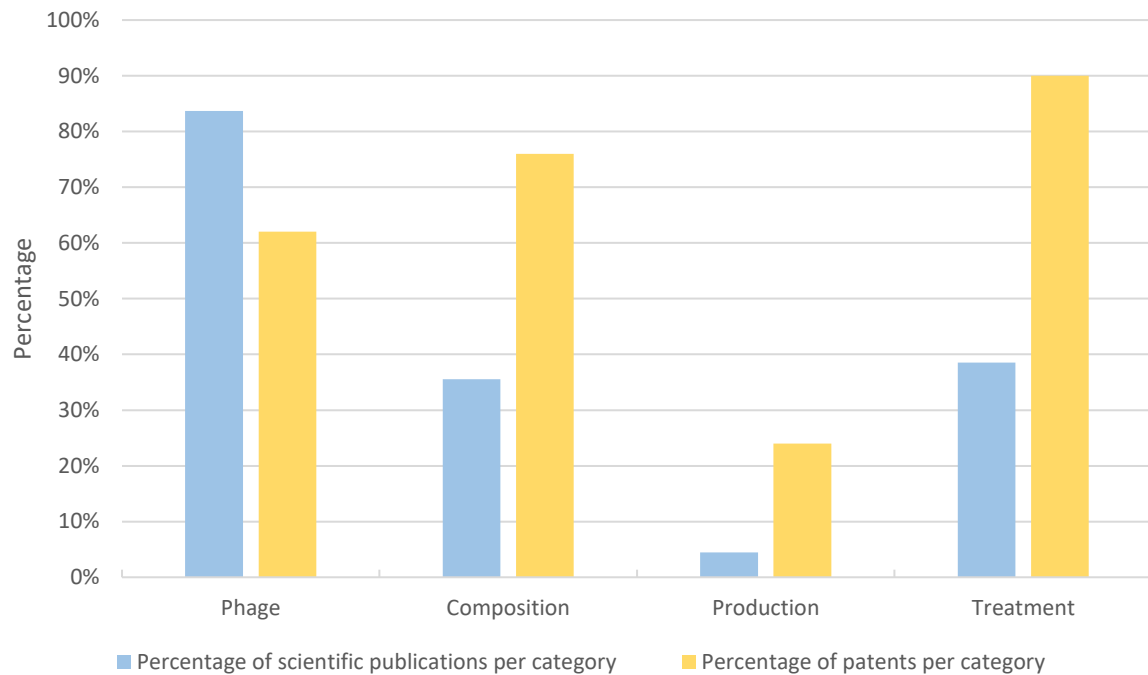

309

310 *Figure 4* Claim and abstract analysis of the active, granted patents and scientific publications. In total,  
311 79 independent claims from 21 patents and 137 abstracts from scientific papers were categorized  
312 among five different categories: (1) Phage – here the phage was described as the active ingredient or  
313 the isolation of a phage was described, (2) Cocktail – this category contains claims that protect the  
314 combination of phages and publications that describe a phage cocktail, (3) Production – ways of how  
315 the phage is produced and (4) Treatment – claims that protect the use of phages to fight a specific  
316 bacterial infection or methods and application strategies for using the phage (e.g. bioassays, field  
317 trials). In blue the percentages of publications are shown, in yellow the percentage of claims. Note:  
318 one publication and patent can be categorized in multiple categories.

319 When evaluating the 77 independent claims of all active, granted patents, the majority of the  
320 claims are process claims protecting different methods to use phages as a treatment for bacterial  
321 infection (40% - Supplementary Figure 1). Furthermore, this data shows that 30% of the claims protect  
322 the composition of the phage product. This means that a combination of phages is protected and/or  
323 the formulation of the final product. 19% can be considered as compound claims as the claim is  
324 protecting the phage(s) as an active ingredient and only 10% of the claims are production claims.

325 The 77 independent claims have also been categorized within three classes: narrow, intermediate  
326 and broadly defined. This gives an indication whether a specific claim can easily be circumvented  
327 (narrowly defined) or not (broadly defined). Table 1 gives an overview of all the granted patents and  
328 the independent claims that belong to this patent. 26% of the claims are narrow claims (e.g. "*The  
329 invention relates to a method for applying a bacteriophage of R. solanacearum, characterized in that the  
330 bacteriophage liquid of R. solanacearum is placed in a sterile syringe needle obliquely inserted into the stem of  
331 the tobacco plant, and then the bacterial phage liquid is covered with sterile mineral oil to prevent evaporation.  
332 And pollution, so that the R. solanaceans phage directly enters the stem of the tobacco through a sterile syringe  
333 needle; the sterile mineral oil is prepared by pouring 300 ml of mineral oil into a 500 ml screw bottle and  
334 sterilizing at 121 ° C 30min, then stored and reserved after cooling; the sterile syringe needle is prepared by  
335 using a sterile blister needle overnight, rinsing twice with sterile water, drying at 50 ° C after autoclaving, and  
336 after cooling to room temperature, Packed and stored for use; each tobacco stem is injected with 50-100 µl of R.  
337 solanacearum phage solution; in the sterile syringe needle inserted into the stem of the tobacco plant, the amount  
338 of sterile mineral oil is 50-100 µl*" – "Treatment claim" - CN104542717). 30% of the claims are  
339 intermediate as they do not cover specific details on the invention (e.g. "*A method for controlling  
340 bacterial wilt disease bacteria, which comprises spraying the bacteriophage strain according to any one of claims*

341 1 to 3 to a plant or soil.” – “Treatment claim” - JP4532959). Finally, 44% can be defined as broad claims  
 342 (e.g. "An isolated bacteriophage which is toxic to *X. fastidiosa* and *Xanthomonas* species, wherein said  
 343 bacteriophage is at least one member selected from the group consisting of Xfas 100 phage type bacteriophage  
 344 and Xfas 300 phage type bacteriophage Of the bacteriophage, wherein the Xfas 100 phage type is selected from  
 345 the group consisting of SEQ ID NO: 11, SEQ ID NO: 12, SEQ ID NO: 13, SEQ ID NO: 14, SEQ ID NO:  
 346 15, SEQ ID NO: 16, SEQ ID NO: 17, and SEQ ID NO: 18 Wherein the Xfas 300 phage type comprises a  
 347 genome having a DNA sequence that is 99% or more identical to the sequence of SEQ ID NO: 19, SEQ ID  
 348 NO: 20, SEQ ID NO: 21, SEQ ID NO: 22, SEQ ID NO: 23 and SEQ ID NO: 24 Select from It comprises a  
 349 sequence a genome having the same DNA sequence 99% or more that is, the bacteriophage.” – “Phage claim”  
 350 - JP6391579).

351 The claims categorized as “Phage claims” are generally narrow defined (41%) as the claims  
 352 protect the phage and its genomic sequence. However, highly similar phages with differences in their  
 353 genomic sequence fall outside the scope of these claim. Thus, the claims can be circumvented. A  
 354 judge, however, may interpret by the claim as equivalent by doctrine of equivalence. The isolation of  
 355 a different phage that targets the same bacterium also circumvents the claim . On the other hand, the  
 356 majority of the “Composition claims” and “Production claims” are difficult to circumvent as they are  
 357 broadly defined (56% and 75% respectively).

358 As mentioned above, four out of 21 granted patents have been filed by a private organization  
 359 (Fixed Phage) and these patents belong to the same patent family. When looking at the claims for  
 360 these patents, one notices that all the claims are broadly defined. As the invention discusses the use  
 361 of phages in a composition to fight bacterial infections without defining the phage itself, the majority  
 362 of the claims protect the composition of the product rather than the phage or the production of the  
 363 product.

364 *Table 1* Claim analysis of the granted patents. Within this table, all granted patents have been  
 365 organized according to the bacterial genera they describe, their patent number, the applicant (private  
 366 sector blue and public sector yellow) and the nationality of the applicant (CN China, ES Spain, GB  
 367 United Kingdom, JP Japan, KR Korea and US United States) and the filing year. Moreover, the claims  
 368 have been categorized according the four different categories: (1) Phage : claims protecting one or  
 369 multiple phages and their genome sequence, (2) Composition : claims discussing the composition of  
 370 a phage product, (3) Production : methods to produce phages and (4) Treatment : methods to use  
 371 phages as a treatment for plant diseases. If a patent contains claims that belong to a specific category,  
 372 it is quantified. The colors indicate the scope of a claim or set of claims: very narrow, intermediate or  
 373 broadly defined (green, orange and red, respectively).

| BACTERIAL<br>GENERA                | PATENT<br>NUMBER            | APPLICANT                             | FILING<br>YEAR | TYPE OF CLAIM |             |            |           |
|------------------------------------|-----------------------------|---------------------------------------|----------------|---------------|-------------|------------|-----------|
|                                    |                             |                                       |                | Phage         | Composition | Production | Treatment |
| <i>OTHER</i>                       | <a href="#">US9539343</a>   | Fixed Phage (GB)                      | 2012           |               | 1           |            | 1         |
|                                    | <a href="#">CN103747792</a> | Fixed Phage (GB)                      | 2012           |               | 1           |            | 1         |
|                                    | <a href="#">JP6230994</a>   | Fixed Phage (GB)                      | 2012           |               | 1           |            | 1         |
|                                    | <a href="#">US9278141</a>   | Fixed Phage (GB)                      | 2013           |               | 5           |            |           |
|                                    | <a href="#">CN104630154</a> | University of Zhejiang (CN)           | 2015           | 1             | 1           | 1          | 2         |
|                                    | <a href="#">KR101887987</a> | Pukyong National University (KR)      | 2016           | 1             | 1           |            | 1         |
| <i>DICKEYA/<br/>PECTOBACTERIUM</i> | <a href="#">KR101368328</a> | Rural development Administration (KR) | 2010           | 1             | 1           |            |           |
|                                    | <a href="#">KR101790019</a> | Rural development administration (KR) | 2014           | 1             | 1           |            | 1         |

|                                 |                              |                                                 |      |   |   |   |   |
|---------------------------------|------------------------------|-------------------------------------------------|------|---|---|---|---|
|                                 | <a href="#">KR101797463</a>  | Rural development Administration (KR)           | 2014 | 1 | 1 |   | 1 |
|                                 | <a href="#">KR101891298</a>  | Seoul National University (KR)                  | 2016 | 1 | 2 |   | 1 |
| <b>PSEUDOMONAS</b>              | <a href="#">KR101584214</a>  | Chungbuk National University (KR)               | 2012 |   | 1 |   | 1 |
| <b>RALSTONIA</b>                | <a href="#">JP4532959</a>    | Sanin Kensetsu Kogyo (JP)                       | 2004 | 3 | 2 |   | 2 |
|                                 | <a href="#">JP4862154</a>    | University of Hiroshima (JP)                    | 2006 | 1 | 1 |   | 3 |
|                                 | <a href="#">US9380786</a>    | University of Hiroshima (JP)                    | 2012 |   |   |   | 1 |
|                                 | <a href="#">JP5812466</a>    | University of Hiroshima (JP)                    | 2011 | 1 |   |   | 3 |
|                                 | <a href="#">CN104542717</a>  | Guizhou Tobacco science research institute (CN) | 2015 |   |   | 1 | 1 |
|                                 | <a href="#">ES2592352</a>    | University of Valencia (ES)                     | 2015 | 1 | 1 |   | 2 |
| <b>XANTHOMONAS/<br/>XYLELLA</b> | <a href="#">AU2013331060</a> | Texas A&M University (US)                       | 2013 | 1 | 1 | 2 | 4 |
|                                 | <a href="#">JP6391579</a>    | Texas A&M University (US)                       | 2013 | 1 | 1 | 2 | 2 |
|                                 | <a href="#">US9357785</a>    | Texas A&M University (US)                       | 2013 |   |   |   | 1 |
|                                 | <a href="#">ZA201502230</a>  | Texas A&M University (US)                       | 2013 | 1 | 1 | 2 | 2 |

374

#### 375 4. Discussion

376 Within this study, we analyzed publishing and patenting activities in phage biocontrol as a crop  
 377 protectant by using the number of scientific papers and patent documents as a measuring tool for  
 378 assessing interest in this area. Furthermore, we looked into the applicants, geographical distribution,  
 379 legal status and scope of the patent documents by categorizing both the patents and scientific  
 380 manuscripts by claims and abstracts. This allowed us to make a general comparison between the  
 381 focus of patents and scientific literature and the willingness of R&D to look into the potential of  
 382 phages as a part of IPM.

383 *Despite a growing interest in phage biocontrol, patenting activities remain limited*

384 The increasing number of scientific publications (Figure 1) shows that there is indeed a growing  
 385 interest to use phages as an alternative to existing plant protecting products. The number of patent  
 386 filings seems to fall behind in 2016 but increases slightly in 2017. However, it is premature to  
 387 determine a trend since not all the applications filed in 2017 and 2018 have passed the 18 months  
 388 period before publication and thus are not made publicly available [24]. 56% of the patent documents  
 389 were filed by non-profit organizations like the University of Hiroshima (JP), The Rural Development  
 390 Administration of South-Korea (KR) and Texas A&M University (US). This confirms the slightly  
 391 stronger interest from non-profit organizations to protect phage biocontrol inventions compared to  
 392 industry. It might also suggest that private companies are still dangling in the start-up phase or have

393 not picked-up the topic yet (apart from a few early adopters). This could also indicate that the  
394 expertise still remains in non-profit and still needs to be transferred to the private sector.

395 The assessment of the legal status of the documents shows a high fraction of dead documents  
396 (39%). Within this group of dead applications, 16% of the applications have been rejected as the  
397 invention was not considered novel (US2009053179) and/or did not include an inventive step  
398 (JP2005073562). The majority of the dead documents are applications that were deemed to be  
399 withdrawn (39%) and patents that are lapsed (16% - no oppositions were filed e.g. EP0182106). In  
400 both cases, the applicants did not pay the fees needed to maintain the rights of the patent. For some  
401 patent applications this is due to a negative search report (GB2519913 and WO2007044428) in which  
402 the invention was not found novel nor inventive. On the other hand, not paying the fees may also  
403 imply internal shifts of interest for commercial or other reasons. Hurdles in the regulation of  
404 biopesticides may influence such decisions as well. In Europe, for instance, the registration exists of  
405 two phases: registration of the active ingredient at European level by the European Food Safety  
406 Authority (EFSA) and next the authorization of the formulated product at member state level leading  
407 to bureaucratic difficulties [17]. As phages are highly specific and can only infect a few strains of one  
408 bacterial species, they are often combined in a cocktail [25]. In terms of registrations, this means that  
409 every phage in the cocktail should be registered as an active ingredient (Regulation (EC) No  
410 1107/2009) and reformulations of the product require reregistrations [4]. The cost of such registrations  
411 may be high (e.g. the registration costs of products corresponding to a “New Active Ingredient, Non-  
412 food use; outdoor; reduced risk” can go up to \$436,004) [26]. Moreover, phage genomes are variable  
413 due to evolutionary fluxes [27], thus phages cannot be considered as stable, fixed products which  
414 could impede registration [28]. Luckily, this can partially be addressed by recent insights on genome-  
415 based taxonomy that phages sharing 95% nucleotide similarity are considered as isolates the same  
416 species [29]. Changes in the regulation including fast track registration, priority registration and zonal  
417 authorization (*i.e.* authorization for all of the EU instead of registration per country) could function  
418 as an incentive to further develop innovations and promote patenting in biocontrol [30]. These  
419 reasons could also explain the low number of filed applications in Europe and North America as  
420 observed in Figure 2. Nevertheless, in the USA, a first phage product line, AgriPhage™, was  
421 registered in the US (2005) by Omnilytics (part of Phagelux). AgriPhage™ is approved by the  
422 Environmental Protection Agency (EPA) and contains products with phages against *Xanthomonas*  
423 *campestris* pv. *vesicatoria* and *Pseudomonas syringae* pv. *tomato*. Currently, Omnilytics has added  
424 cocktails against *Erwinia amylovora* and *Clavibacter michiganensis* subsp. *michiganensis* to their product  
425 line [31]. Notably, none of these products or phages have been found by the authors in the public  
426 assessed databases. This may imply that the patents could be licensed (e.g. from an academic  
427 partner), the applications are not publicly available yet or the product is not patented opening the  
428 discussion whether patenting is indeed crucial for commercial activities of phage applications in  
429 agriculture.

#### 430 *Efforts in Asia to protect phage biocontrol preparations*

431 The geographical distribution of the patent documents (Figure 2) shows that the majority was  
432 filed in Asia (43%). This observation might be explained by local governmental stimuli to promote  
433 patenting to cause rapid economic growth [32,33]. China, for instance has implemented so-called  
434 patent promotion policies. These policies stimulate patenting since tax incentives and subsidies are  
435 linked to patent ownership and have caused a booming growth of the number of Chinese patent  
436 applications and patents [33]. Furthermore, Asia in general, is taking measures to reduce the amount  
437 of chemical pesticides and fertilizers. China for instance has launched a “national research program  
438 on reduction in chemical pesticides and fertilizers in China” (\$ 340 million) [30]. Within the study  
439 presented here, 19% of all documents have been filed in China. In contrast, 63% of these documents  
440 are dead from which 92% are applications that were deemed to be withdrawn as fees were not paid.  
441 This might implicate that the applicants lost their confidence in the invention. The number of granted,  
442 active patents is high in Japan and South-Korea, further illustrating Asian efforts to develop new  
443 biocontrol strategies. A study from the Food and Agriculture Organization from the United Nations

444 (FAO) and the Asia and Pacific Plant Protection Commission (APPPC) has shown that both Japan  
445 and South-Korea are promoting integrated pest management strategies by setting pesticide reduction  
446 targets (KR) and appointing IPM expert groups (JP) [34].

447 *Scientific publications and patent documents show a correlation in terms of targeted pathogens*

448 To get a more profound idea about the focus of the patent and scientific literature, both datasets  
449 have been classified according to the most prominent bacterial genera causing plant diseases [9]  
450 (Figure 3). In general, the percentages of scientific publications and patent families discussing a  
451 specific bacterial genus correspond quite well. Within the datasets here presented, the most studied  
452 bacterial genus is *Ralstonia*. Not surprisingly as these bacteria cause disease in a wide range of cash  
453 crops like tomato, potato, tobacco, eggplant and banana [35]. In the dataset, tomato is the most  
454 researched crop. The majority of the documents categorized within this group have been filed by  
455 non-profit organizations rather than industrial applicants. This suggests that the actual interest from  
456 industry is still rather limited compared to academia. The second most prominent group is the  
457 combination of *Xanthomonas* and *Xylella*. Both pathogens can have a significant impact in crop  
458 production and hence it is not remarkable that these bacteria are largely represented in phage  
459 biocontrol research [26, 27]. Furthermore, the majority of the applications have been filed by the  
460 public sector. The *Pseudomonas* genus, including of *Pseudomonas syringae* and its pathovars, are less  
461 represented within both databases. This is striking as *P. syringae* pathovars are considered as one of  
462 the most important PPB causing disease in different crops (tomato, bean, kiwi, leek and others) [38].  
463 As Figure 3 shows, there is a discrepancy within the “Other” group. This category combines  
464 documents that talk about other bacterial genera or do not specify the bacterium that is being  
465 addressed. The majority of the patents and patent applications have been classified in this category  
466 since these do not specify a particular bacterial genus. From these patent documents, we observe that  
467 all the granted patents filed by industrial applicants have chosen this option (Table 1). This might  
468 suggest that industry defines claims containing bacteriophages as broad as possible to get patent  
469 exclusive rights to any phage product that falls under the protection of the patent. By applying this  
470 strategy, companies are taking risks in their patenting strategy because these broad claims are more  
471 susceptible in terms of novelty anticipation that may invalidate them [39].

472 *Granted patents include broad claims*

473 The main focus of the scientific publications and the granted patents indicate a difference in  
474 emphasis (Figure 4). While the majority of the manuscripts discuss the isolation of one or more  
475 bacteriophages and their basic characterization, the majority of the patents claim a method of treating  
476 a bacterial infection by means of a phage product. Only 39% of scientific papers address the latter  
477 although this could be considered as the ultimate goal of phage biocontrol. This illustrates that first  
478 efforts are made in the field but that there are still opportunities for further innovations.

479 Limited efforts have been made towards patenting detection strategies for and by phages in the  
480 field of phage biocontrol in crop production. Since phages are highly specific to a specific bacterium  
481 and can locate their host in a complex matrix of bacteria they can easily be used as a detection tool  
482 [40]. However, this study suggests that little published evidence is available done in this area by both  
483 the scientific community and the industrial early adopters as there are no claims protecting possible  
484 methods of detection and only a small minority (8%) of scientific papers discuss this matter.

485 The claims that belong to the “Phage” category consist of claims that protect a natural occurring  
486 phage. According to Art. 3 of the Biotechnology Directive 98/44/EC (European Commission), natural  
487 phages can be patented because the phage is isolated from the environment [21]. The techniques to  
488 isolate phages are however similar to the ones used in 1920 which makes the patentability of natural  
489 phages fragile [20]. Nevertheless, claims for isolated phages can be of great value since patents  
490 covering such claims may give the right to prevent others from using that particular phage. On the  
491 contrary, as phages are abundantly present in the environment, the chances of finding a similar, yet  
492 different phage exists which may circumvent the claim. However, as the literature on phages  
493 applicable for phage biocontrol increases, anticipation of novelty as patentability requirement of a

494 particular phage may become an issue. In the US, the requirement of novelty is more complicated, as  
495 the phage will be excluded for patentability if on the one side it is known or used within the US, or  
496 on the other side published or patented wherever in the world [21].

497 Figure 4 also shows that there is limited evidence on the optimization of the production of phage  
498 cocktails based on both scientific and patent literature. One could argue that the production of phages  
499 is phage dependent (specific bacterial strains, media, temperature) and thus keeping the production  
500 of phages secret could be a valid strategy to maintain a competitive edge [18].

501 On the other hand, many patents claim the combination of phages or phages as part of a  
502 formulation. This is illustrated by Supplementary Figure 1. Claiming a combination of phages can act  
503 as a buffer to reduce the risk of resistance development of the target bacterium. Phages are known to  
504 have different infection strategies and highly diverse genomes making the chances that a certain  
505 bacterium develops resistance (by altering receptors, CRISPRs, restriction enzymes) against two or  
506 even three phages in one cocktail are theoretically small [4,41,42]. The strength of these claims can be  
507 questioned as minor changes to the cocktail could already be sufficient to circumvent claims.

508 Table 1 depicts in which categories the individual patents can be classified. Here it is clear that  
509 the different patents combine different types of claims. Combined with the scope of the claims, this  
510 might support the previous statement that companies employ a “throw everything at the wall to see  
511 what sticks” patenting strategy because of the uncertainty and the ignorance how to achieve a strong  
512 protection for the invention [18].

### 513 *Phages and other viruses as part of an integrated pest management strategy*

514 To safeguard public health and minimize impact on the environment, traditional pesticides used  
515 in crop production are currently being stigmatized. This triggers the research community to evaluate  
516 new, alternative methods to deal with different kinds of pests like fungi, bacteria and insects. The use  
517 of relatively high concentrations of natural predators to eradicate a certain pest, also known as  
518 augmentative biocontrol, is gaining in popularity [30]. In this regard, bacteriophages and other  
519 viruses, like insect viruses and mycoviruses, are ideal candidates as biocontrol agents because they  
520 are sustainable, specific and do not leave residues on the crop. Moreover, they fit into the framework  
521 of integrated pest management where the use of biocontrol agents is heavily promoted [30]. Viruses  
522 as biocontrol agents are, however, sometimes overlooked in IPM [15], which indicates that more  
523 efforts need to be taken to integrate these viral strategies. This review shows that there is indeed a  
524 basis within the scientific community to investigate the potential of phages to be used as biocontrol  
525 agents. In 2018, a Horizon 2020 consortium has been established to investigate viruses and their  
526 potential to serve as a possible solution against pests both as probiotic and viral treatment strategy  
527 (<https://viroplant.eu/>). Initiatives like these together with more in depth research are needed to  
528 provide fundamental insights to close the gap between academia and industry in this matter and to  
529 stimulate the industry to invest in phage biocontrol.

### 530 **Supplementary Materials:**

531

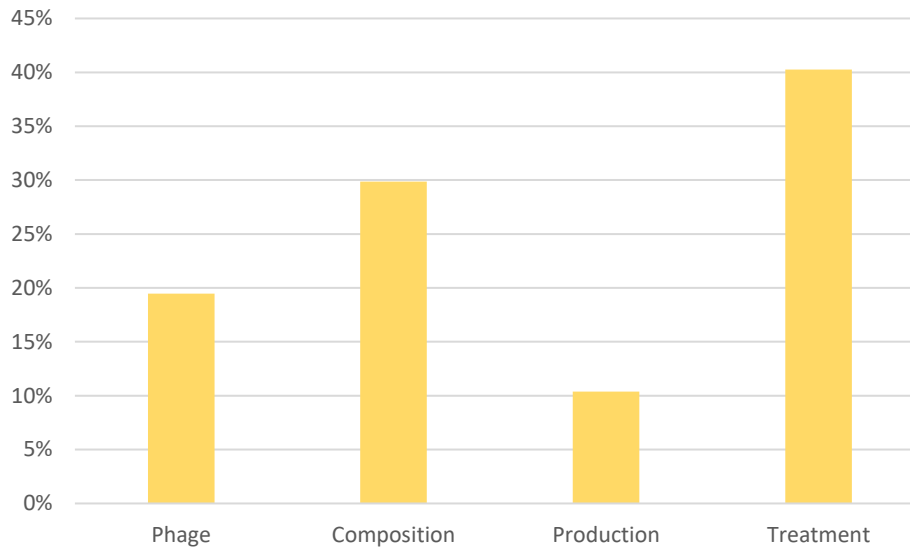

532

533 **Supplementary Figure 1 Percentages of independent claims per category.** The independent claims, 77 in total,  
534 from the 21 granted patents have been categorized among five different categories: (1) Phage – here the phage  
535 was described as the active ingredient or the isolation of a phage was described, (2) Cocktail – this category  
536 contains claims that protect the combination of phages or phages as part of a composition (3) Detection –  
537 strategies to use phages for detection or to detect the phage itself, (4) Production – ways of how the phage is  
538 produced and (5) Treatment – claims that protect the use of phages to fight a specific bacterial infection or  
539 methods and application strategies for using phage.

540 **Author Contributions:** Conceptualization, DH, RL, IH and JW; methodology, DH and IH; writing—original  
541 draft preparation, DH; writing—review and editing, RL, IH and JW.

542 **Funding:** DH, IH, RL and JW are supported by the European Union’s Horizon 2020 Research and Innovation  
543 Program (773567; [www.vioplant.eu](http://www.vioplant.eu)) and by a VLAIO LA-grant (150914). DH holds a predoctoral scholarship  
544 from FWO-strategic basic research.

545 **Conflicts of Interest:** The authors declare no conflict of interest.

## 546 References

- 547 1. Twort, F.W. AN INVESTIGATION ON THE NATURE OF ULTRA-MICROSCOPIC VIRUSES. *Lancet*  
548 **1915**, *186*, 1241–1243.
- 549 2. D’Herelle, F.; Roux On an invisible microbe antagonistic toward dysenteric bacilli: brief note by Mr. F.  
550 D’Herelle, presented by Mr. Roux. *Res. Microbiol.* **158**, 553–554.
- 551 3. Pirnay, J.P.; De Vos, D.; Verbeken, G.; Merabishvili, M.; Chanishvili, N.; Vaneechoutte, M.; Zizi, M.;  
552 Laire, G.; Lavigne, R.; Huys, I.; et al. The phage therapy paradigm: Prêt-à-porter or sur-mesure? *Pharm.*  
553 *Res.* **2011**, *28*, 934–937.
- 554 4. Buttimer, C.; McAuliffe, O.; Ross, R.P.; Hill, C.; O’Mahony, J.; Coffey, A. Bacteriophages and bacterial  
555 plant diseases. *Front. Microbiol.* 2017.
- 556 5. Mallmann, W., and Hemstreet, C. Isolation of an inhibitory substance from plants. *Agric. Res.* **1924**, *28*,  
557 599–602.
- 558 6. Okabe, N.; Goto, M. Bacteriophages of Plant Pathogens. *Annu. Rev. Phytopathol.* **1963**, *1*, 397–418.
- 559 7. Strange, R.; Scott, P.R. Plant disease: A threat to global food security. *Annu. Rev. Phytopathol.* **2005**, *43*,  
560 83–116.
- 561 8. Inagro IWT - beheersing bacteriële pathogeen opkweek kolen-prei. Available online:  
562 <http://leden.inagro.be/Wie-is-Inagro/Projecten/project/13960> (accessed on Dec 27, 2018).

- 563 9. Mansfield, J.; Genin, S.; Magori, S.; Citovsky, V.; Sriariyanum, M.; Ronald, P.; Dow, M.; Verdier, V.; Beer,  
564 S. V.; Machado, M.A.; et al. Top 10 plant pathogenic bacteria in molecular plant pathology. *Mol. Plant*  
565 *Pathol.* **2012**, *13*, 614–629.
- 566 10. Cooksey, D. a Genetics of Bactericide. *Annu. Rev. Phytopathol.* **1990**, *28*, 201–19.
- 567 11. Frampton, R.A.; Pitman, A.R.; Fineran, P.C. Advances in bacteriophage-mediated control of plant  
568 pathogens. *Int. J. Microbiol.* **2012**, *2012*.
- 569 12. Pietrzak, U.; McPhail, D.C. Copper accumulation, distribution and fractionation in vineyard soils of  
570 Victoria, Australia. *Geoderma* **2004**, *122*, 151–166.
- 571 13. Copping, L.G.; Duke, S.O. Natural products that have been used commercially as crop protection agents.  
572 *Pest Manag. Sci.* **2007**, *63*, 524–554.
- 573 14. Ray, D.K.; Mueller, N.D.; West, P.C.; Foley, J.A. Yield Trends Are Insufficient to Double Global Crop  
574 Production by 2050. *PLoS One* **2013**, *8*, e66428.
- 575 15. Stenberg, J.A. A Conceptual Framework for Integrated Pest Management. *Trends Plant Sci.* **2017**, *22*, 759–  
576 769.
- 577 16. McDougall Cost of Crop Protection Innovation Increases to \$286 Million per Product Available online:  
578 <https://www.ecpa.eu/news/cost-crop-protection-innovation-increases-286-million-product> (accessed on  
579 Feb 9, 2019).
- 580 17. European Crop Protection *Registering plant protection products in the EU*; Brussels, 2013;
- 581 18. Todd, K. the Promising Viral Threat To Bacterial Resistance: the Uncertain Patentability of Phage  
582 Therapeutics and the Necessity of Alternative Incentives. *J.D. Expect.* **2019**.
- 583 19. Williams, H.L. How do patents affect research investments? *Annu Rev Econ.* **2017**, *9*, 441–469.
- 584 20. Pirnay, J.-P.; Verbeken, G.; Rose, T.; Jennes, S.; Zizi, M.; Huys, I.; Lavigne, R.; Merabishvili, M.;  
585 Vanechoutte, M.; Buckling, A.; et al. Introducing yesterday's phage therapy in today's medicine. *Future*  
586 *Virol.* **2012**, *7*, 379–390.
- 587 21. Verbeken, G. TOWARDS AN ADEQUATE REGULATORY FRAMEWORK FOR BACTERIOPHAGE  
588 THERAPY, KU Leuven and Royal Military Academy, 2015.
- 589 22. Verbeure, B.; Matthijs, G.; Van Overwalle, G. Analysing DNA patents in relation with diagnostic genetic  
590 testing. *Eur. J. Hum. Genet.* **2006**, *14*, 26–33.
- 591 23. Huys, I.; Berthels, N.; Matthijs, G.; Van Overwalle, G. Legal uncertainty in the area of genetic diagnostic  
592 testing. *Nat. Biotechnol.* **2009**, *27*, 903–909.
- 593 24. EPO Basic definitions Available online: [https://www.epo.org/searching-for-patents/helpful-](https://www.epo.org/searching-for-patents/helpful-resources/first-time-here/definitions.html)  
594 [resources/first-time-here/definitions.html](https://www.epo.org/searching-for-patents/helpful-resources/first-time-here/definitions.html) (accessed on Feb 14, 2019).
- 595 25. Rombouts, S.; Volckaert, A.; Venneman, S.; Declercq, B.; Vandenhuevel, D.; Allonsius, C.N.; Van  
596 Malderghem, C.; Jang, H.B.; Briers, Y.; Noben, J.P.; et al. Characterization of novel bacteriophages for  
597 biocontrol of bacterial blight in leek caused by *Pseudomonas syringae* pv. *porri*. *Front. Microbiol.* **2016**,  
598 *7*, 1–15.
- 599 26. EPA PRIA Fee Category Table - Registration Division - New Active Ingredients Available online:  
600 <https://www.epa.gov/pria-fees/pria-fee-category-table-registration-division-new-active-ingredients>  
601 (accessed on Feb 15, 2019).
- 602 27. Barbosa, C.; Venail, P.; Holguin, A. V.; Vives, M.J. Co-Evolutionary Dynamics of the Bacteria *Vibrio* sp.  
603 CV1 and Phages V1G, V1P1, and V1P2: Implications for Phage Therapy. *Microb. Ecol.* **2013**, *66*, 897–905.
- 604 28. European Commission *GUIDANCE DOCUMENT FOR THE ASSESSMENT OF THE EQUIVALENCE OF*  
605 *TECHNICAL GRADE ACTIVE INGREDIENTS FOR IDENTICAL MICROBIAL STRAINS OR ISOLATES*



- 606 APPROVED UNDER REGULATION ( EC ) No 1107 / 2009; 2014;
- 607 29. Adriaenssens, E.M.; Rodney Brister, J. How to name and classify your phage: An informal guide. *Viruses*
- 608 2017, 9, 1–9.
- 609 30. van Lenteren, J.C.; Bolckmans, K.; Köhl, J.; Ravensberg, W.J.; Urbaneja, A. Biological control using
- 610 invertebrates and microorganisms: plenty of new opportunities. *BioControl* 2018, 63, 39–59.
- 611 31. AgriPhage™ Product info AgriPhage Available online: <https://www.agriphage.com/product-info/>
- 612 (accessed on Feb 9, 2019).
- 613 32. Erstling, J.; Strom, R. Korea's Patent Policy and Its Impact on Economic Development: A Model for
- 614 Emerging Countries. *San Diego Int'l LJ* 2009, 441–481.
- 615 33. Long, C.X.; Wang, J. China's patent promotion policies and its quality implications. *Sci. Public Policy*
- 616 2018.
- 617 34. APPPC; FAO Plant protection profiles from Asia-Pacific countries - Chapter 3 Intergrated Pest
- 618 Management Available online: <http://www.fao.org/docrep/010/ag123e/AG123E22.htm> (accessed on Feb
- 619 13, 2019).
- 620 35. Álvarez, B.; Biosca, E.G. Bacteriophage-Based Bacterial Wilt Biocontrol for an Environmentally
- 621 Sustainable Agriculture. *Front. Plant Sci.* 2017, 8, 1–7.
- 622 36. Ryan, R.P.; Vorhölter, F.J.; Potnis, N.; Jones, J.B.; Van Sluys, M.A.; Bogdanove, A.J.; Dow, J.M.
- 623 Pathogenomics of Xanthomonas: Understanding bacterium-plant interactions. *Nat. Rev. Microbiol.* 2011,
- 624 9, 344–355.
- 625 37. Janse, J.D.; Obradovic, A. XYLELLA FASTIDIOSA: ITS BIOLOGY, DIAGNOSIS, CONTROL AND
- 626 RISKS. *J. Plant Pathol.* 2010, 92, S1.35-S1.48.
- 627 38. Xin, X.F.; Kvitko, B.; He, S.Y. Pseudomonas syringae: What it takes to be a pathogen. *Nat. Rev. Microbiol.*
- 628 2018, 16, 316–328.
- 629 39. WIPO IP and Business: Quality Patents: Claiming what Counts Available online:
- 630 [https://www.wipo.int/wipo\\_magazine/en/2006/01/article\\_0007.html](https://www.wipo.int/wipo_magazine/en/2006/01/article_0007.html) (accessed on Feb 14, 2019).
- 631 40. Schofield, D.A.; Bull, C.T.; Rubio, I.; Wechter, W.P.; Westwater, C.; Molineux, I.J. Development of an
- 632 engineered bioluminescent reporter phage for detection of bacterial blight of crucifers. *Appl. Environ.*
- 633 *Microbiol.* 2012, 78, 3592–3598.
- 634 41. Labrie, S.J.; Samson, J.E.; Moineau, S. Bacteriophage resistance mechanisms. *Nat. Rev. Microbiol.* 2010, 8,
- 635 317–327.
- 636 42. Chan, B.K.; Abedon, S.T.; Loc-Carrillo, C. Phage cocktails and the future of phage therapy. *Future*
- 637 *Microbiol.* 2013, 8.
- 638
- 639

640

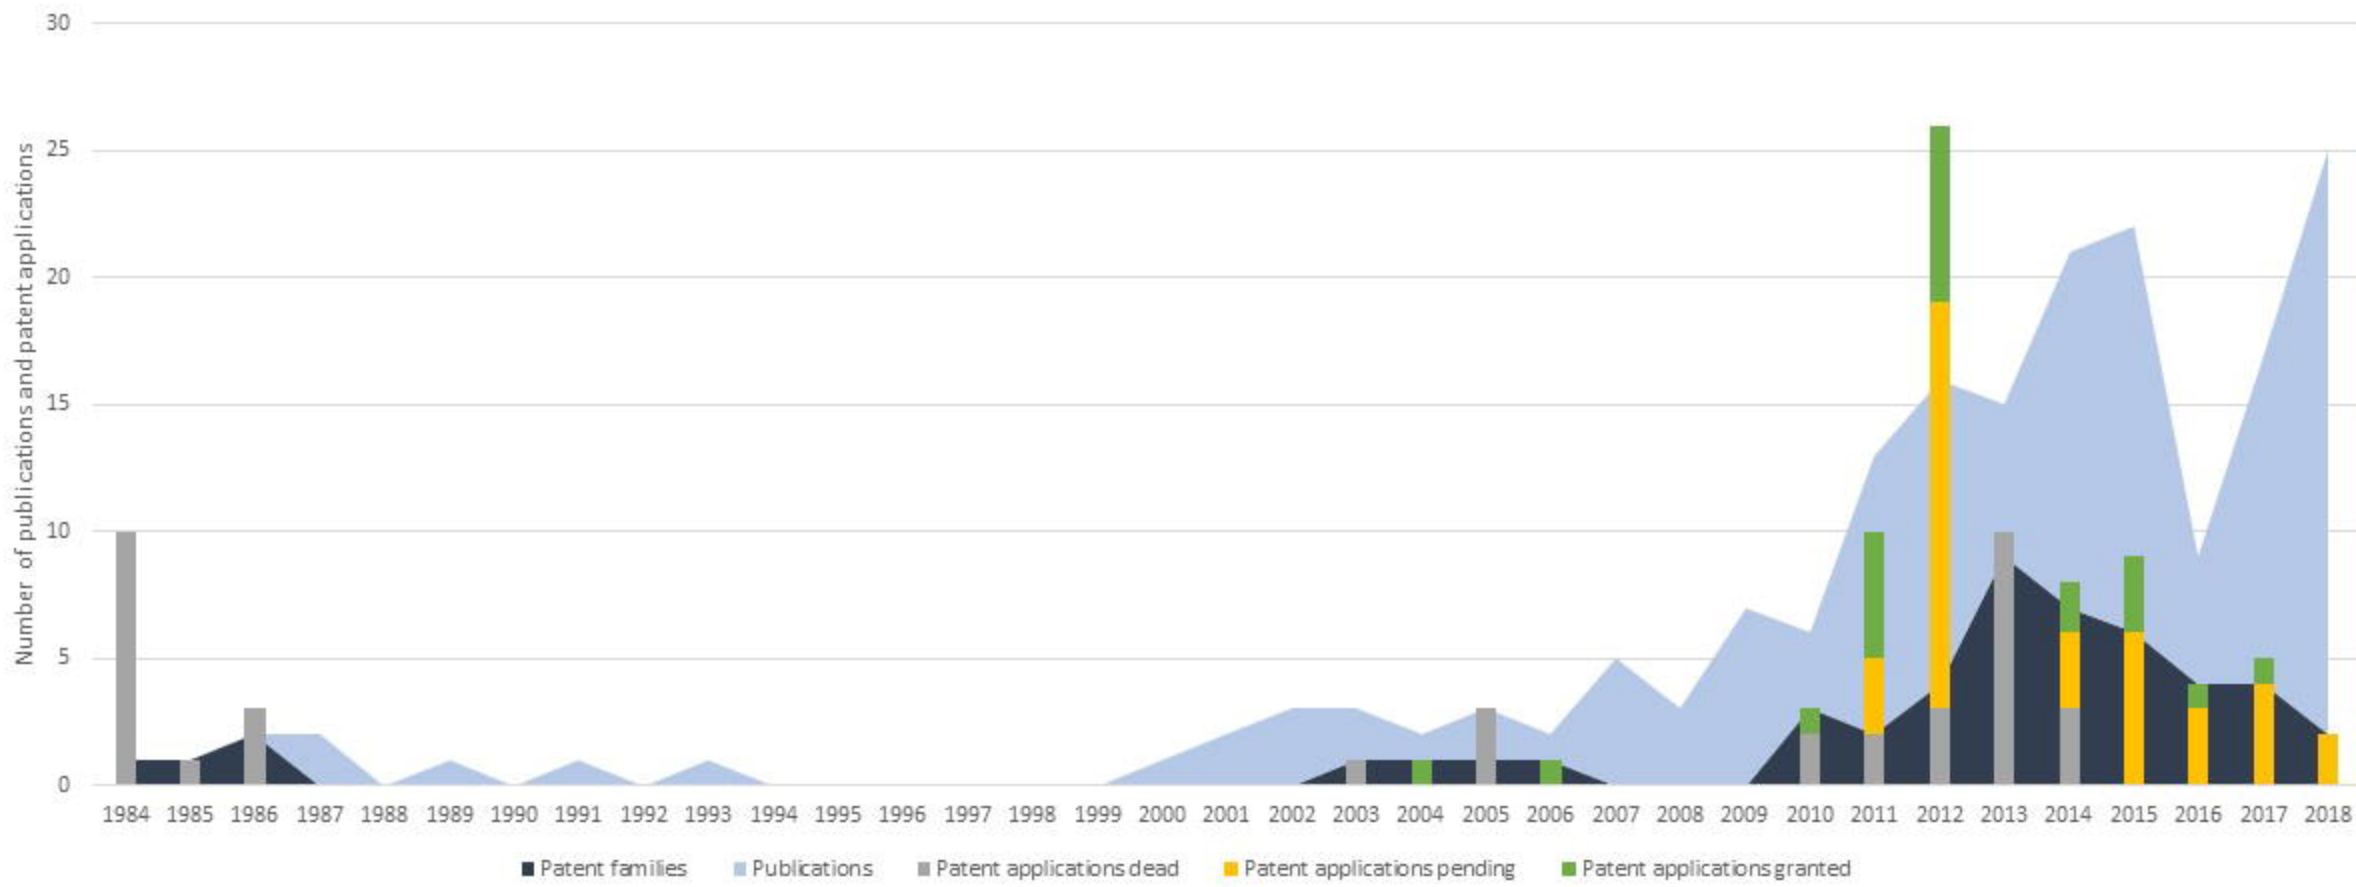

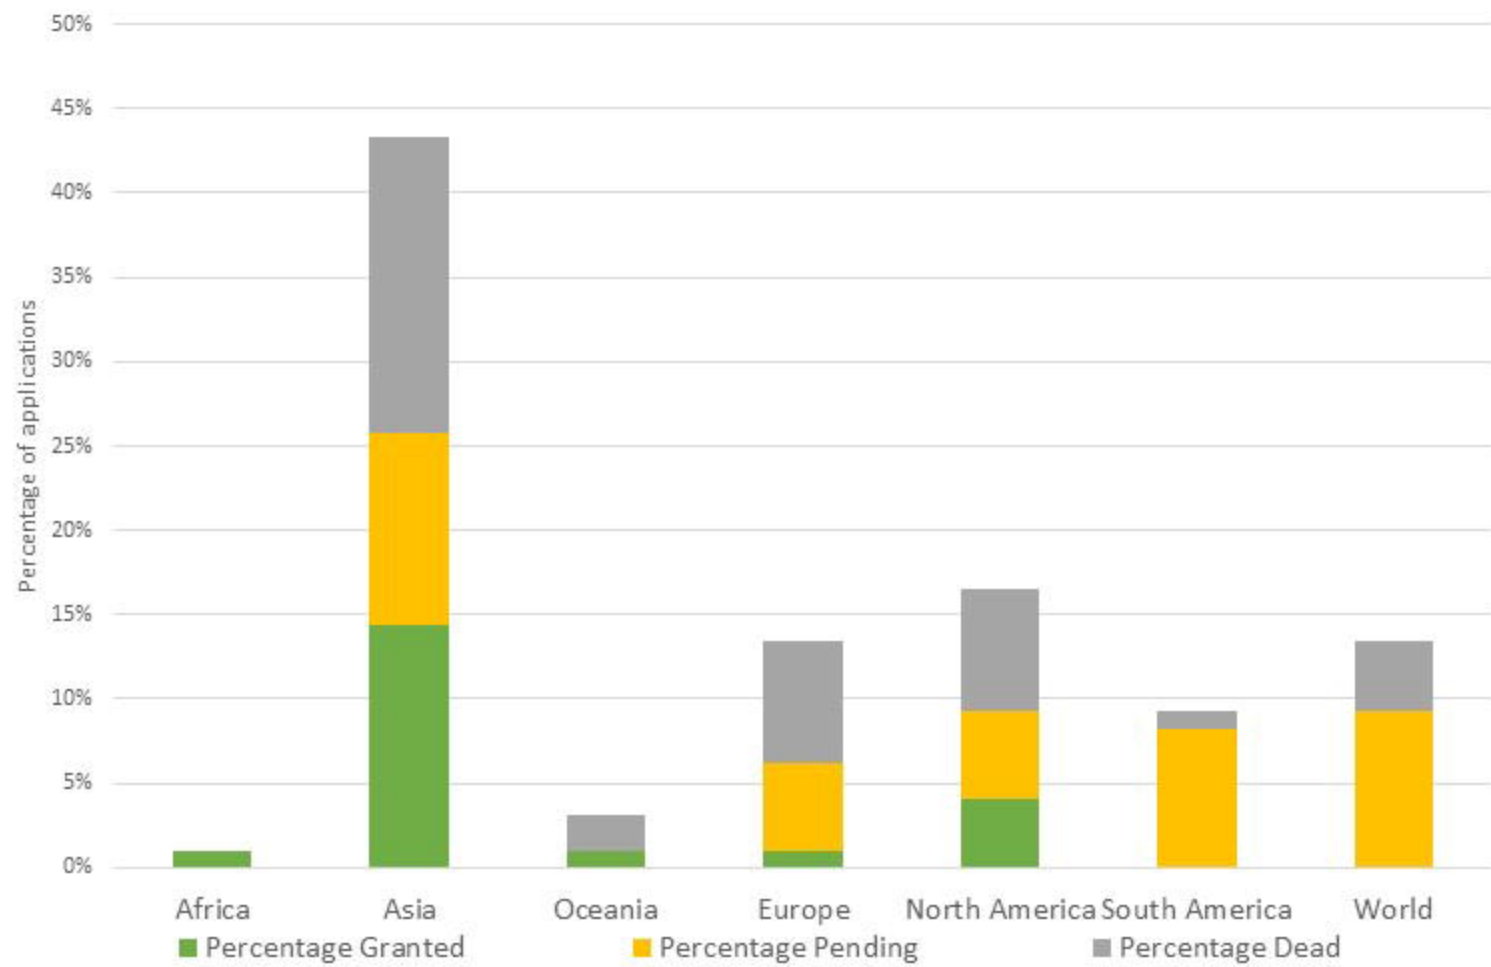

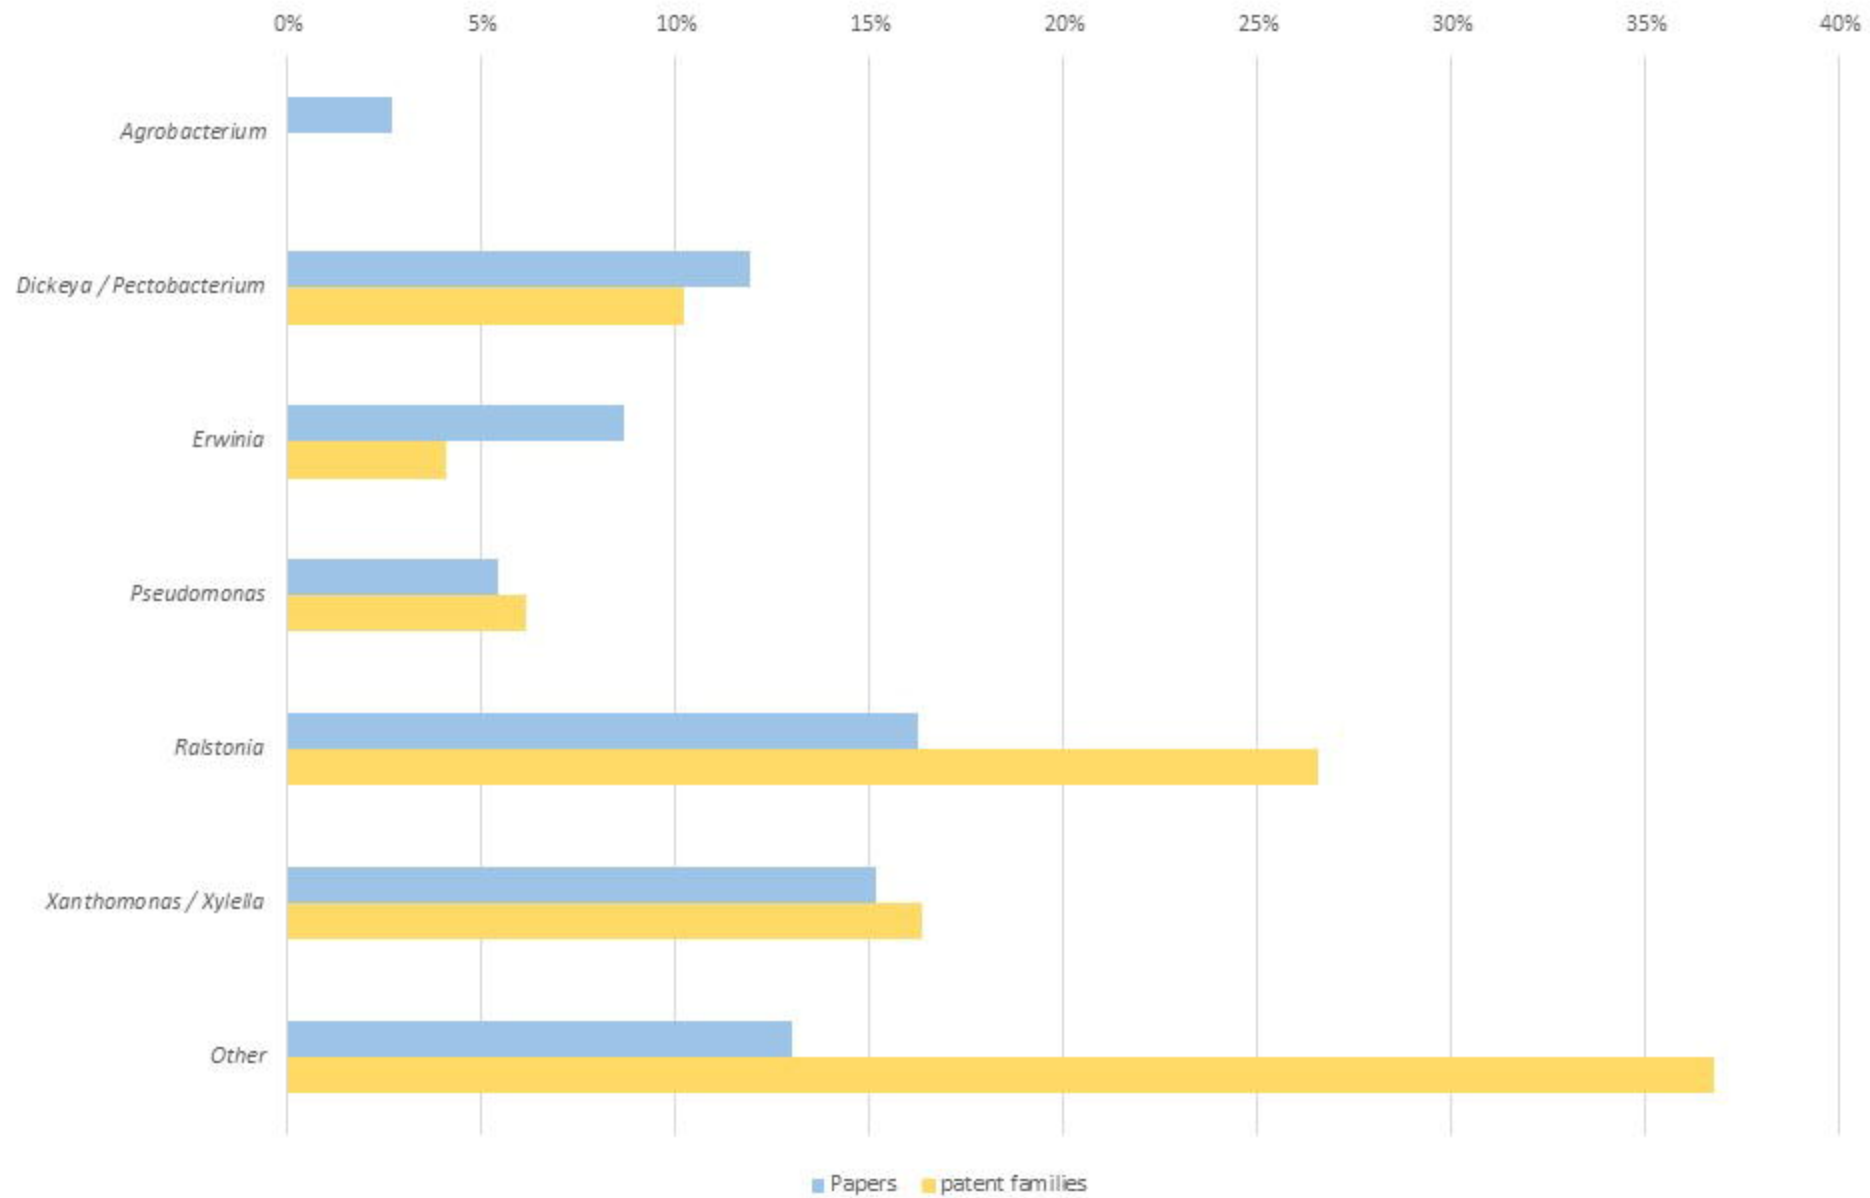

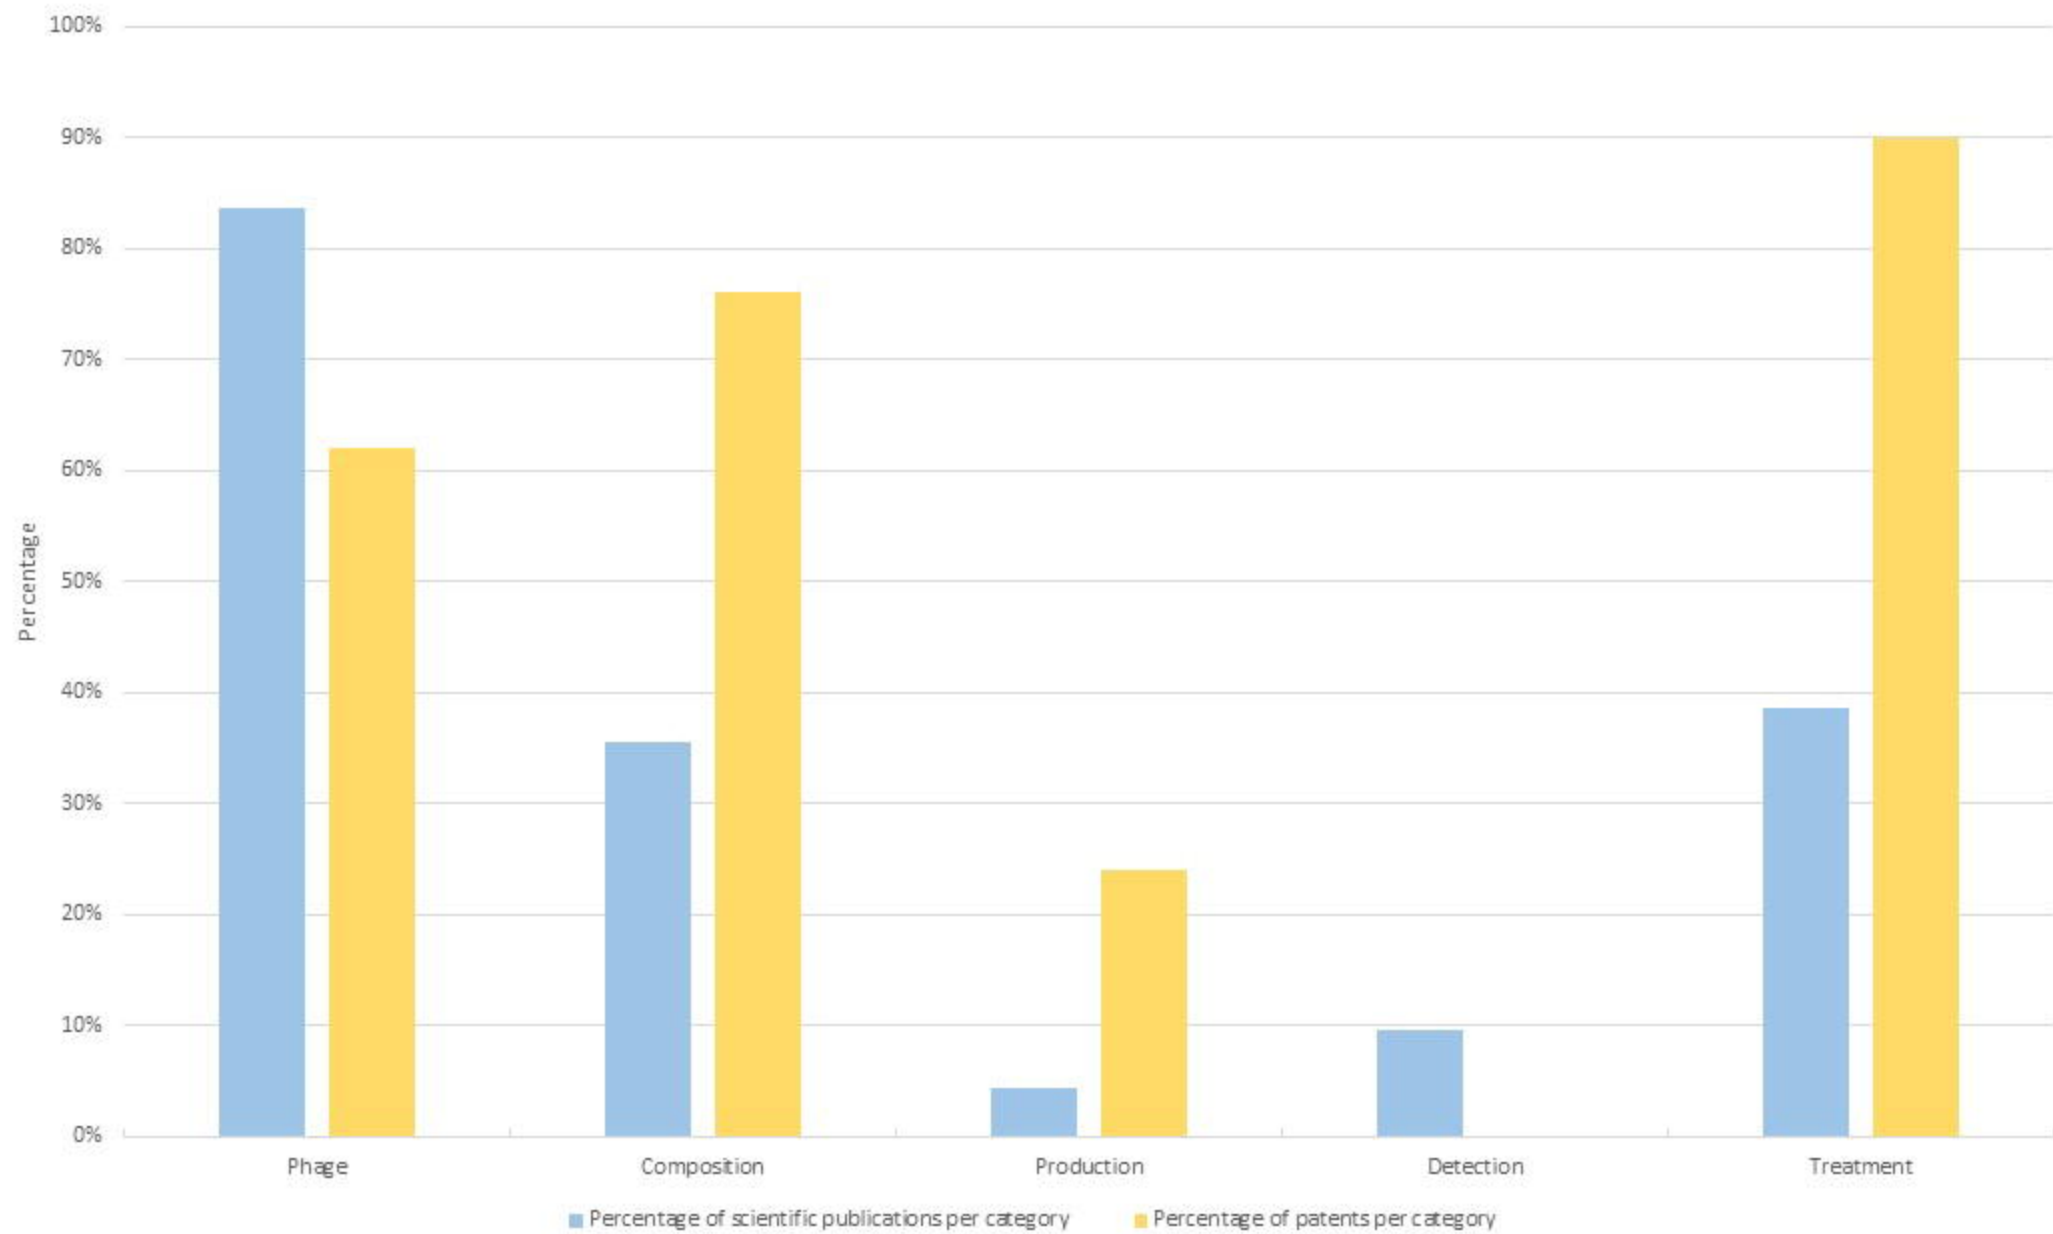

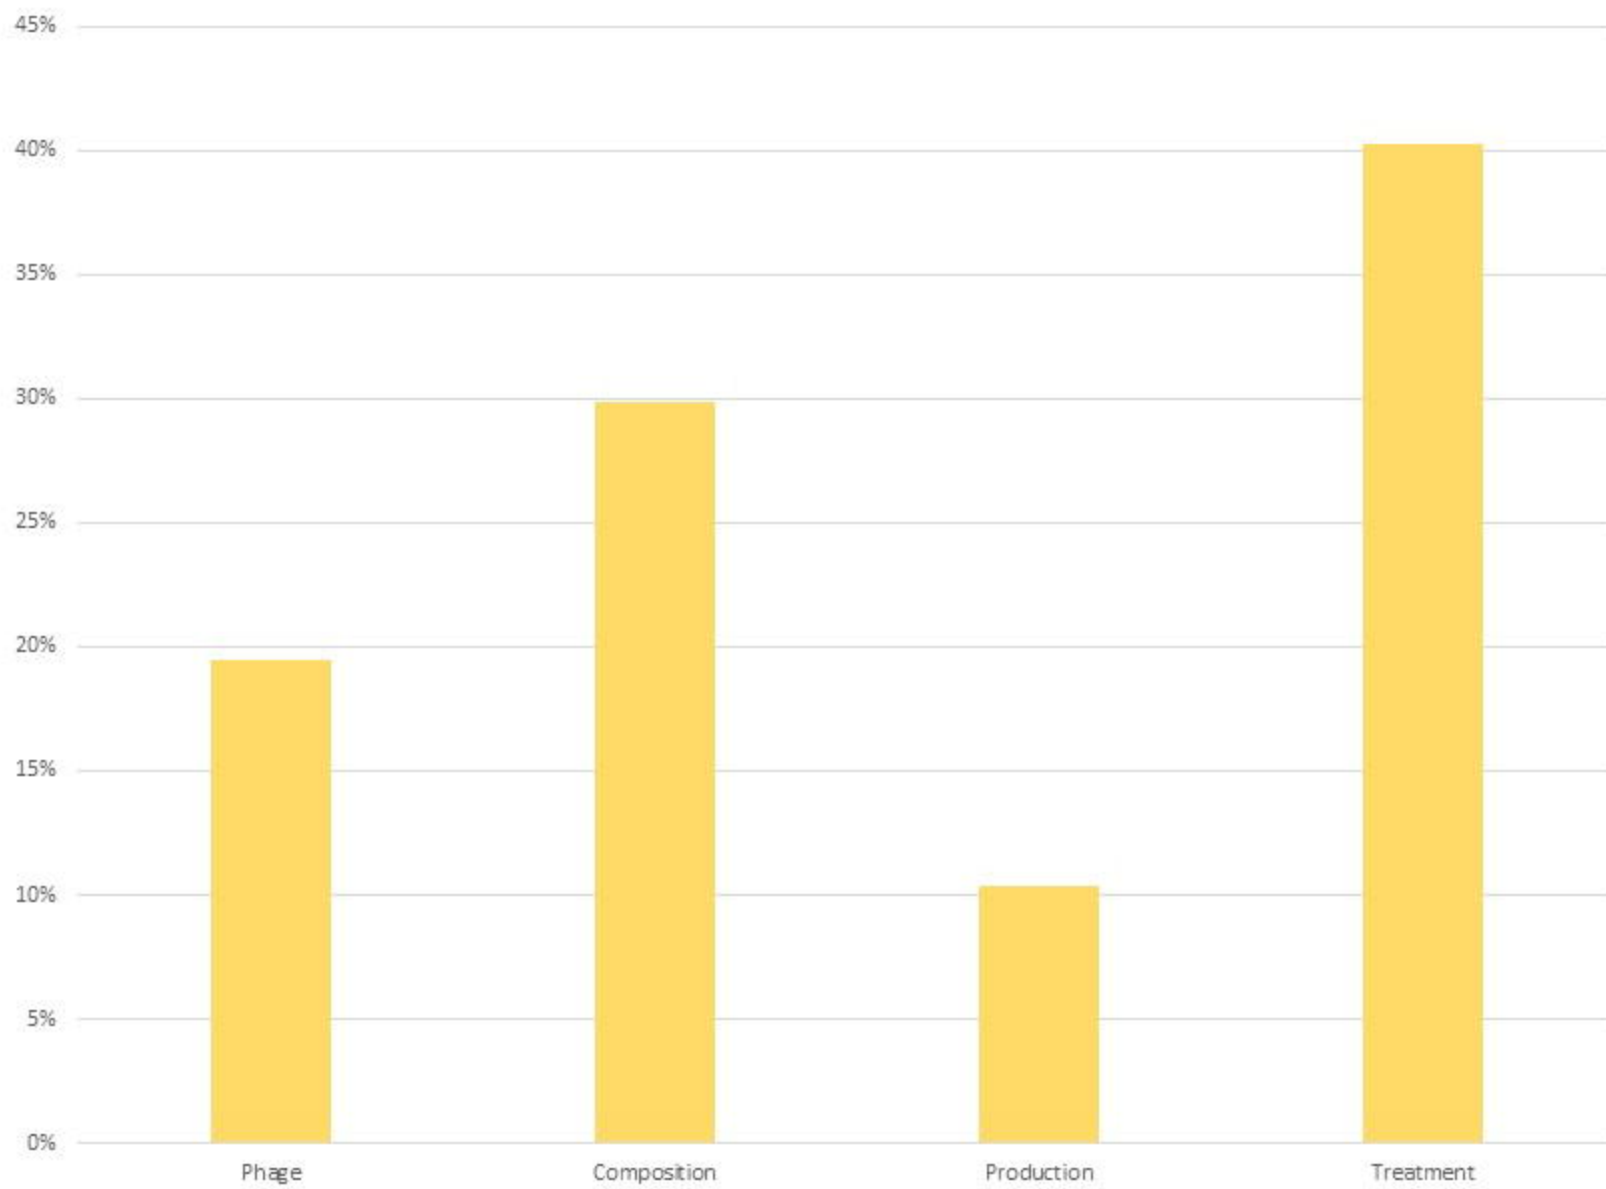

Source: http://biorxiv.org/content/10.1101/555904v1.full.pdf
